# Supplementary material
Source: publisher figshare collection journal article supplement (https://tandf.figshare.com/ndownloader/files/13079726)
Supplement: Supplementary file 1 [file 13079726]

**Influence of novel carrier Soluplus® on aqueous stability, oral bioavailability and anticancer activity of Morin hydrate**

Abhijeet D. Kulkarnia*, Veena S. Belgamwarb

a Industrial Pharmacy Laboratory, R. C. Patel Institute of Pharmaceutical Education and Research, Shirpur, Maharashtra, India.

b Department of Pharmaceutical Sciences, RTM Nagpur University, Nagpur, Maharashtra, India.

***Corresponding Authors**

Tel.: +91 7875038969; Fax: 02563-251808

Email: [kulkarniabhijeet11@gmail.com](mailto:kulkarniabhijeet11@gmail.com) (A.D. Kulkarni);

[vbelgamwar@gmail.com](mailto:vbelgamwar@gmail.com)(V.S. Belgamwar)

**Supplementary File**

**
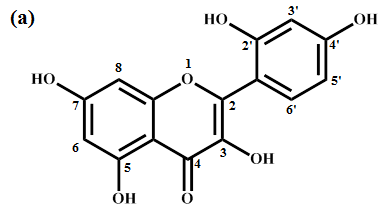
**


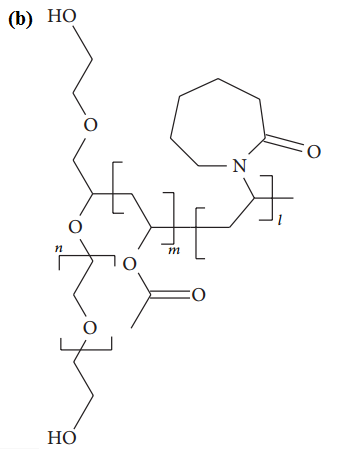


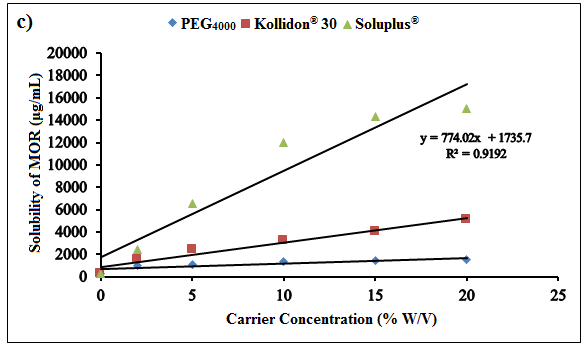


**Fig. 1S.** Chemical structure of Morin hydrate (a) Soluplus® (b) and phase solubility diagram of MOR in aqueous solutions of varied carriers (c).


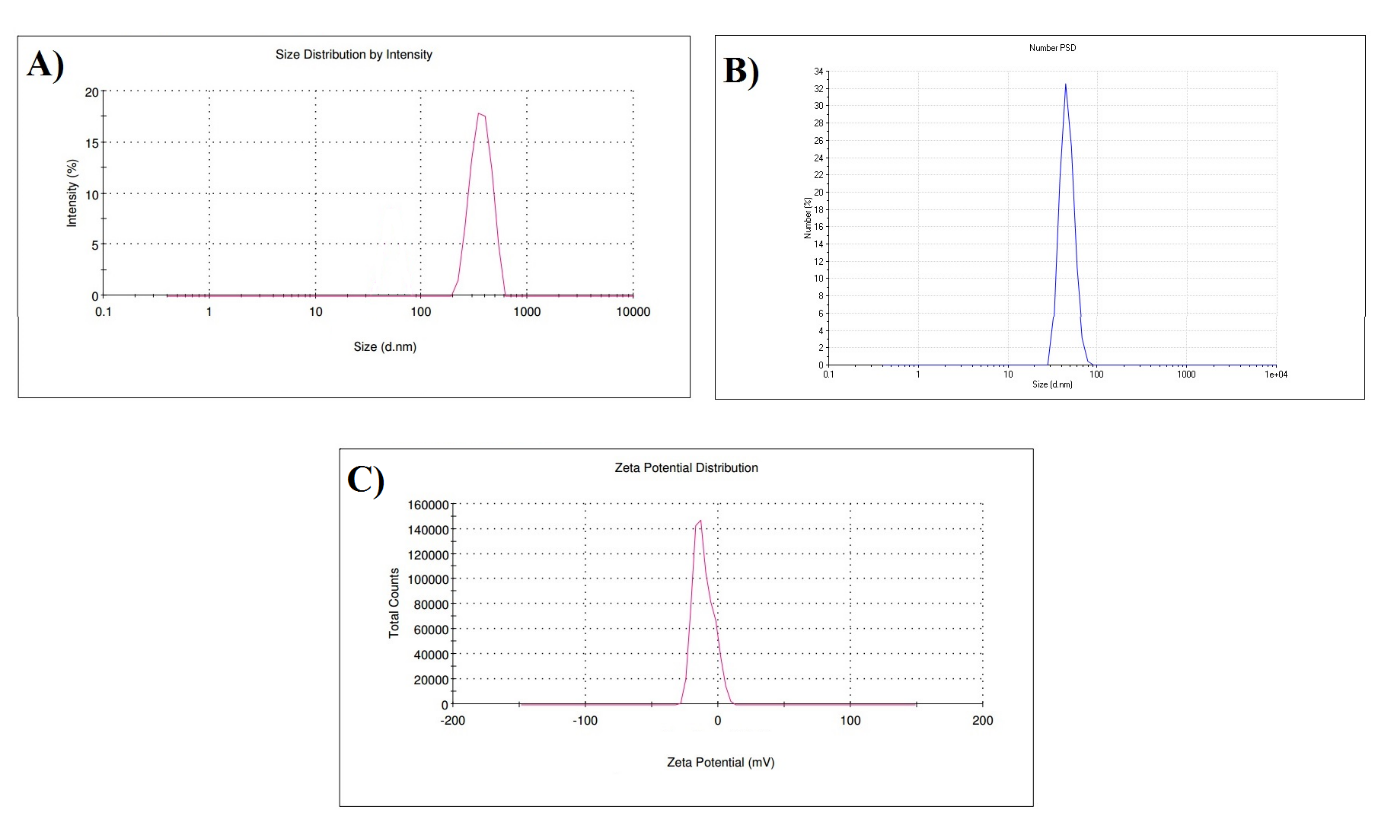


**Fig. 2S.** Intensity particle size distribution (A) number particle size distribution (B) and zeta potential (**ζ**) distribution (C) of optimized formulation SSD F(7) by Malvern Zetasizer.


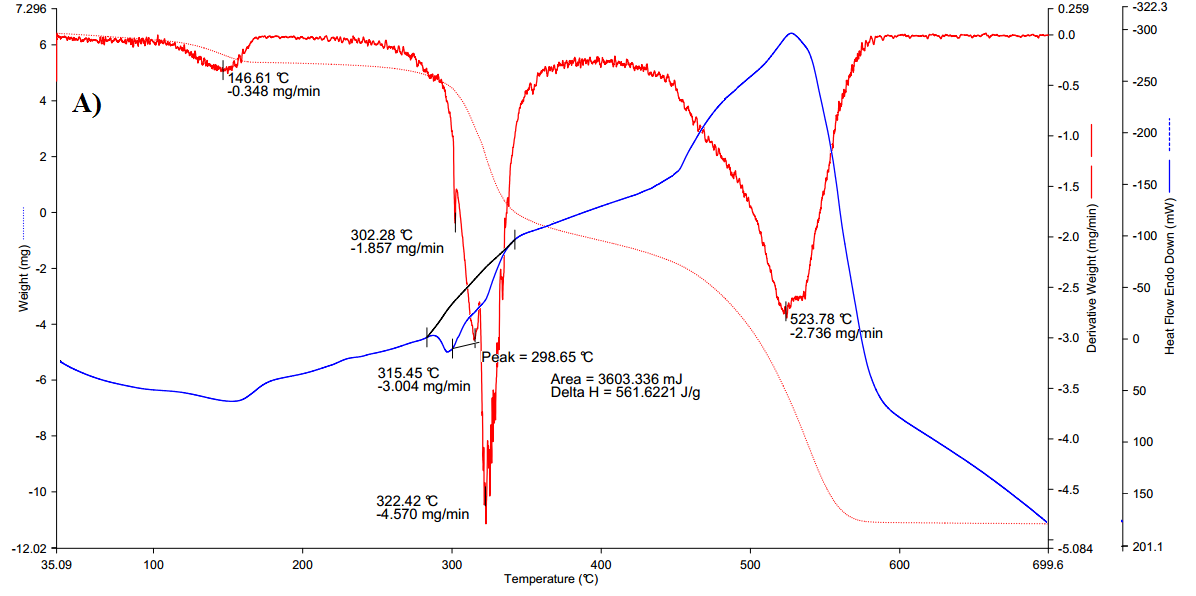


.


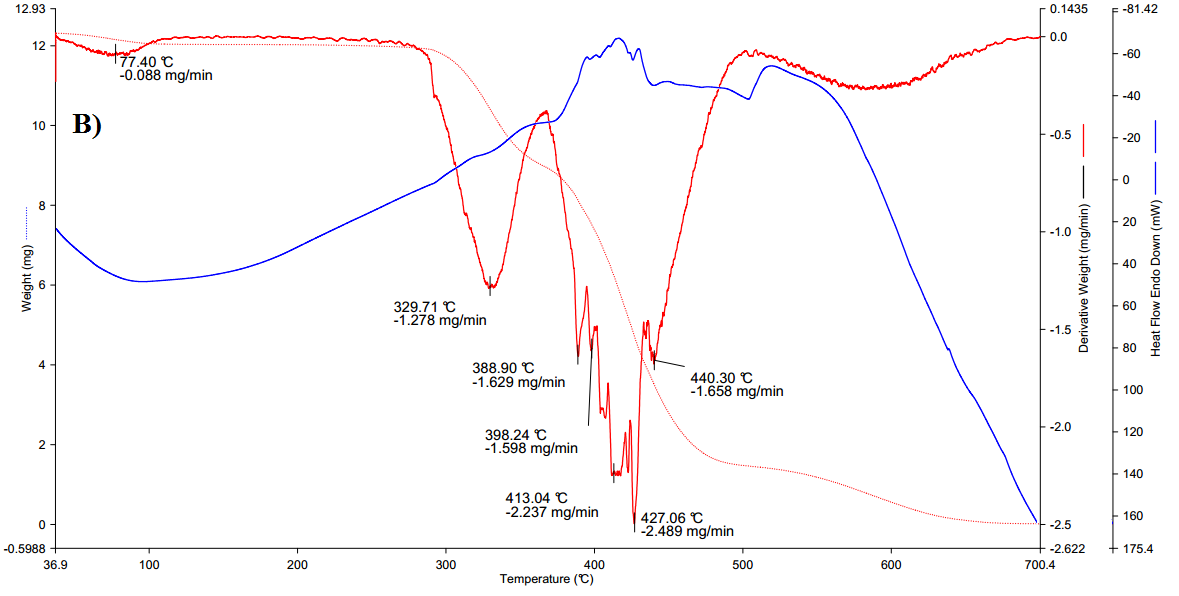


**Fig. 3S.** TGA-DTA analysis curves of MOR (A), Soluplus® (B), PM (C) and SSD F(7) (D).


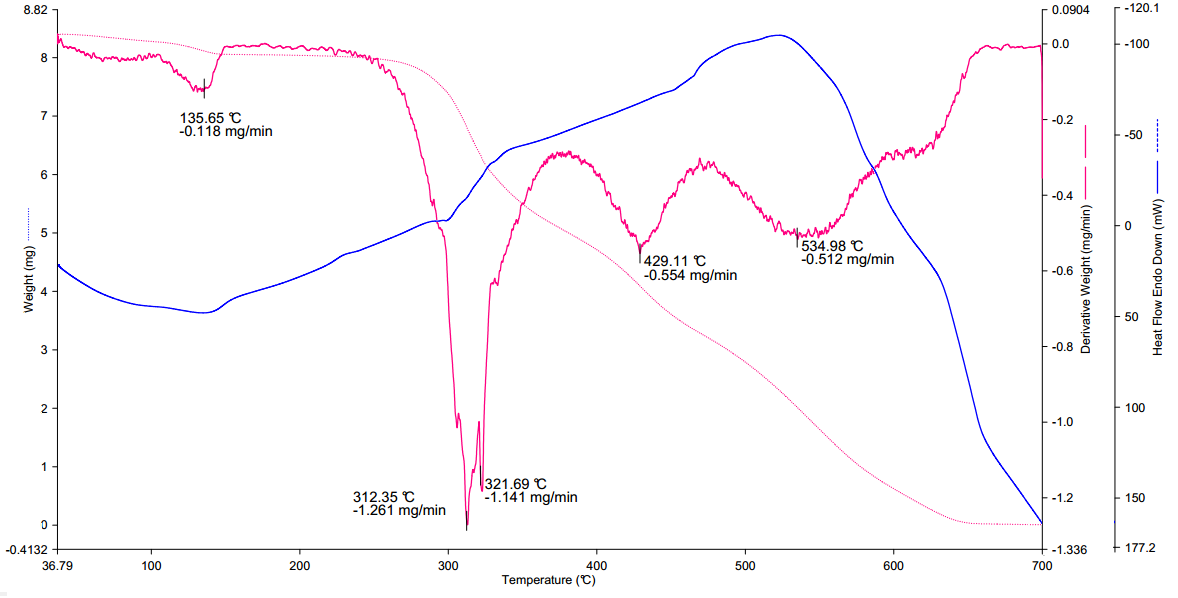


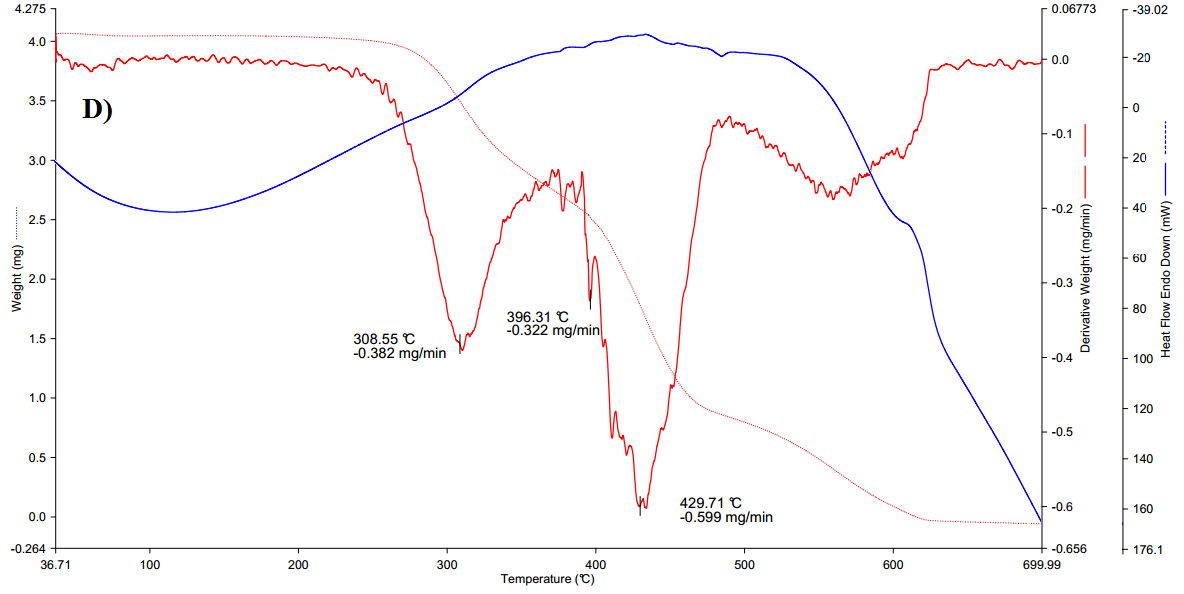


**Fig. 3S.***Continued*


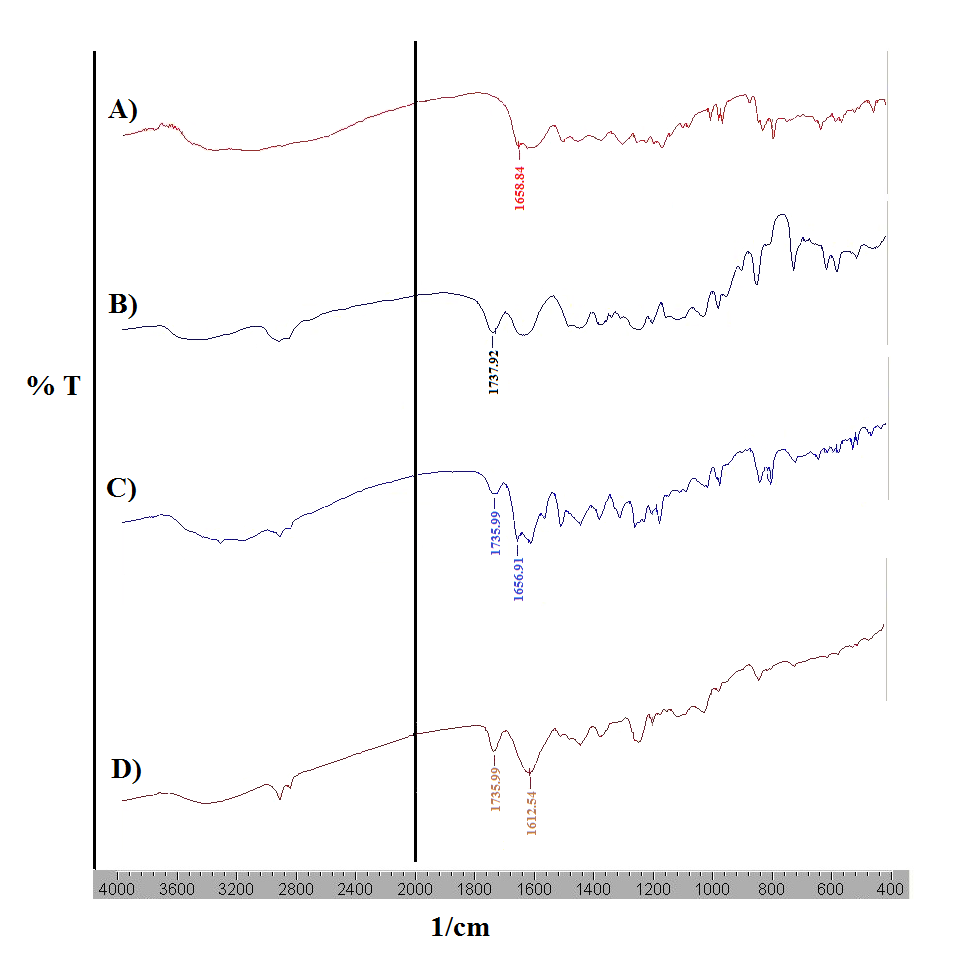


**Fig. 4S.**Fourier transform infrared spectrum of MOR (A), Soluplus® (B), PM (C) and SSD F(7) (D).


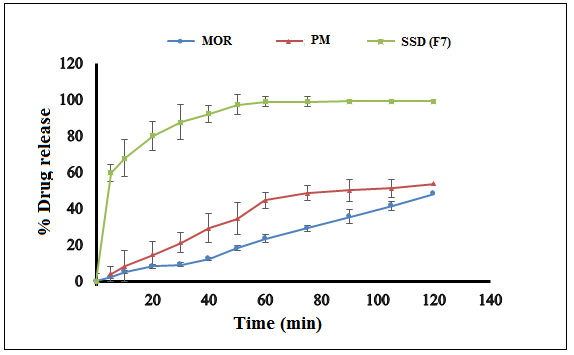


**Fig. 5S.** *In vitro* dissolution profiles of MOR, PM and optimized formulation SSD F(7). Data represents mean ± standard deviation (*n*=3).
